# Supplementary material for: Pre-stroke apathy symptoms are associated with an increased risk of delirium in stroke patients
Source: PubMed Central journal article supplement (PMC5550489; doi:10.1038/s41598-017-08087-7), 2017-08-09
Supplement: 41598_2017_8087_MOESM1_ESM.pdf [file 41598_2017_8087_MOESM1_ESM.pdf]

**Pre-stroke apathy symptoms are associated with an increased risk  
of delirium in stroke patients.**

Elzbieta Klimiec<sup>1</sup>, MD; Katarzyna Kowalska<sup>1</sup>, MSc; Paulina Pasinska<sup>1</sup>, MD; Aleksandra Klimkowicz-Mrowiec<sup>1</sup> PhD, MD; Aleksandra Szyper<sup>1</sup>, MSc; Joanna Pera<sup>1</sup>, PhD, MD; Agnieszka Slowik<sup>1</sup>, PhD, MD; Tomasz Dziedzic<sup>1\*</sup>, MD, PhD.

1. Jagiellonian University Medical College, Department of Neurology, ul. Botaniczna 3, 31-503 Krakow, Poland

\* dziedzic@cm-uj.krakow.pl

Phone +48 12 424-86-00

Supplementary Data

Table S1. Pre-stroke medications in patients with and without delirium.

|                                                 | <b>Delirium<br/>(n=143)</b> | <b>No delirium<br/>(n=393)</b> | <b>p Value</b> |
|-------------------------------------------------|-----------------------------|--------------------------------|----------------|
| Acetylsalicylic acid, n (%)                     | 47 (32.9)                   | 128 (32.6)                     | 0.93           |
| Statins, n (%)                                  | 45 (31.5)                   | 92 (23.4)                      | 0.06           |
| Oral hypoglycemic agents, n (%)                 | 23 (16.1)                   | 68 (17.3)                      | 0.70           |
| Insulin, n (%)                                  | 18 (12.6)                   | 22 (5.6)                       | <0.01          |
| Beta blockers, n (%)                            | 65 (45.5)                   | 138 (35.1)                     | 0.03           |
| Angiotensin converting enzyme inhibitors, n (%) | 61 (42.7)                   | 122 (31.0)                     | 0.01           |
| Diuretics, n (%)                                | 47 (32.9)                   | 82 (20.9)                      | <0.01          |
| Antidepressants, n (%)                          | 3 (2.1)                     | 15 (3.8)                       | 0.27           |
| Neuroleptics, n (%)                             | 2 (1.4)                     | 5 (1.3)                        | 0.98           |
| Benzodiazepines, n (%)                          | 4 (2.8)                     | 8 (2.0)                        | 0.69           |
